# Supplementary material
Source: MDPI journal article supplement (https://www.mdpi.com/2673-6500/3/1/9)
Supplement: s1 [file s1]

**Table S1.** Specimen information of eight *Thesium* species morphologically similar to *T. celatum* and *T. hispidifructum*, examined during this study. Where available herbarium barcodes are provided for specimens. Missing information are indicated with “-”.

| Species                  | Collector name(s) and number        | Date              | Country      | Herbarium                              |
|--------------------------|-------------------------------------|-------------------|--------------|----------------------------------------|
| <i>T. burchellii</i>     | Burchell W.J. 2504 (Type)           | -                 | South Africa | K000431630                             |
|                          | Kelaole E.T. 509                    | 01 November 1968  | Botswana     | K                                      |
| <i>T. gracilarioides</i> | Acocks J.P.H. 8505                  | 09 January 1938   | South Africa | K                                      |
|                          | Compton R.H. 26525                  | 30 January 1957   | Eswatini     | PRE0379172-0, PRE0713888-0             |
| <i>T. gracilarioides</i> | Compton R.H. 28367                  | 18 November 1958  | Eswatini     | PRE0714493-0                           |
|                          | Galpin E.E. 543 (Type)              | 09 October 1889   | South Africa | K000431692                             |
|                          | Galpin E.E. M315                    | 19 January 1919   | South Africa | PRE0379029-0                           |
|                          | Germishuizen G. 5806                | 09 December 1992  | South Africa | PRE0787354-0                           |
|                          | Hafstrom A.H.F. & Acocks J.P.H. 466 | 26 October 1938   | South Africa | PRE0379024-0                           |
|                          | Hilliard O.M. & Burt B.L. 18466     | 24 October 1985   | South Africa | PRE0686502-0                           |
|                          | Hilliard O.M. & Burt B.L. 18497     | 29 October 1985   | South Africa | PRE0686480-0                           |
|                          | Kluge J.P. 1102                     | 27 October 1977   | South Africa | PRE0521280-0                           |
|                          | Rogers F.A. 18269                   | November 1915     | South Africa | K                                      |
|                          | Rogers F.A. 21549                   | -                 | South Africa | K                                      |
|                          | Saltmarshe E. 1048 (Type)           | 15 September 1890 | South Africa | K000431693, PRE0379033-0               |
|                          | Stauffer H.U. & Weder M. 5278       | 11 October 1963   | South Africa | PRE0379031-0                           |
|                          | Stauffer H.U. & Weder M. 5282       | 11 October 1963   | South Africa | PRE0379030-0                           |
|                          | Thode H.J. A1638                    | October 1928      | South Africa | PRE0456333-0                           |
|                          | van Vuuren D.R.J. 263               | 01 August 1957    | South Africa | PRE0379022-0                           |
|                          | Venter S. 10720                     | 04 July 1985      | South Africa | PRE0729407-0                           |
|                          | Visser N. & Le Roux M.M. 222        | 29 October 2016   | South Africa | PRE0992554-0                           |
|                          | Visser N. & Le Roux M.M. 223        | 29 October 2016   | South Africa | PRE0992552-0                           |
|                          | Visser N. & Le Roux M.M. 224        | 29 October 2016   | South Africa | PRE0992788-0                           |
| <i>T. megalocarpum</i>   | Dinter M.K. 912 (Type)              | 03 December 1908  | Namibia      | K000431790, SAM0074307-1, SAM0074307-2 |
|                          | Dinter M.K. 726 (Type)              | 29 November 1908  | Namibia      | SAM0074310-0                           |
|                          | Giess J.W.H. 12506                  | 08 March 1973     | Namibia      | PRE0455938-0                           |
|                          | Strohbach B.J. 2664                 | 30 March 1996     | Namibia      | PRE0081689-0                           |
|                          | Schoenfelder E.B.W. S.390           | 09 January 1934   | Namibia      | PRE0375102-0                           |
|                          | Dinter M.K. 5639                    | 20 February 1925  | Namibia      | PRE0375104-0                           |
|                          | Boss J. s.n. (TRV 36386)            | 01 January 1937   | Namibia      | PRE0375101-0                           |
|                          | Dinter M.K. 585 (Type)              | -                 | Namibia      | K000431789                             |
| <i>T. procerum</i>       | Bonsma K. s.n. (TRV 12776)          | May 1913          | South Africa | PRE0377494-0                           |
|                          | Bredenkamp G.J. 809                 | 07 April 1972     | South Africa | PRE0377552-0                           |
|                          | Codd L.E.W. 2314                    | 11 December 1946  | South Africa | PRE0374114-0                           |
|                          | De Castro A. 1100                   | 06 November 2006  | South Africa | PRE0850766-0                           |
|                          | Du Plessis C.J. 976                 | 29 October 1968   | South Africa | PRE0381904-0                           |

|                         |                                                          |                   |              |                        |
|-------------------------|----------------------------------------------------------|-------------------|--------------|------------------------|
|                         | <i>Hafstrom A.H.F. &amp; Acocks J.P.H.</i> 463           | 03 October 1938   | South Africa | PRE0374115-0           |
|                         | <i>Leendertz R.</i> 2546                                 | 26 November 1909  | South Africa | PRE0377496-0           |
|                         | <i>Le Roux M.M.</i> 180                                  | 18 October 2016   | South Africa | PRE0992424-0           |
|                         | <i>Mogg A.O.D.</i> 20486                                 | 03 January 1953   | South Africa | PRE0374116-0           |
|                         | <i>Repton J.E.</i> 3887                                  | 25 November 1951  | South Africa | PRE0379045-0           |
|                         | <i>Repton J.E.</i> 4022                                  | 01 February 1953  | South Africa | PRE0374117-0           |
|                         | <i>Rogers F.A.</i> 30021                                 | 13 October 1917   | South Africa | PRE0374112-0           |
|                         | (Type)                                                   |                   |              |                        |
|                         | <i>Rudatis H.H.</i> 2614                                 | 02 April 1922     | South Africa | PRE0746458-0           |
|                         | <i>Strey R.G.</i> 3266                                   | 27 March 1960     | South Africa | PRE0377554-0           |
|                         | <i>Thode J.</i> 4814                                     | January 1912      | South Africa | PRE0745528-0           |
|                         | <i>Thode J.</i> A1768                                    | December 1928     | South Africa | PRE0375258-0           |
|                         | <i>Wells M.J.</i> 4052                                   | 15 October 1969   | South Africa | PRE0614888-0           |
| <i>T. whyteanum</i>     | <i>Brass L.J.</i> 16750                                  | 09 July 1946      | Malawi       | K                      |
|                         | <i>Chapman J.D.</i> 662                                  | 18 June 1958      | Malawi       | K                      |
|                         | <i>Goodier; Phipps</i> 37                                | 19 April 1957     | Zimbabwe     | K                      |
|                         | <i>Brummitt R.K., Banda, E.A. &amp; Blackmore S.</i> 405 | 13 February 1979  | Malawi       | K                      |
|                         | <i>Chapman J.D.</i> 6064                                 | 24 December 1981  | Malawi       | K                      |
|                         | <i>Brass L.J.</i> 16406                                  | 24 June 1946      | Malawi       | K                      |
|                         | <i>Chapman J.D. &amp; Chapman E.G.</i> 7970              | 17 August 1986    | Malawi       | K                      |
|                         | <i>Jackson G.</i> 1966                                   | 16 July 1956      | Malawi       | K                      |
|                         | <i>Chapman J.D. &amp; Patel I.H.</i> 5779                | 12 May 1981       | Malawi       | K                      |
|                         | <i>Salubeni A.J.</i> 1588                                | 19 May 1971       | Malawi       | K                      |
|                         | <i>West O.</i> 3647                                      | 18 May 1958       | Zimbabwe     | K                      |
|                         | <i>Brummitt R.K., Banda, E.A. &amp; Blackmore S.</i> 371 | 12 February 1979  | Malawi       | K                      |
|                         | <i>Richards H.M.</i> 16589                               | 07 June 1962      | Malawi       | K                      |
|                         | <i>Pawek J.</i> 3838                                     | 17 September 1970 | Malawi       | K                      |
|                         | <i>Phipps J.B.</i> 664                                   | 16 March 1957     | Zimbabwe     | K                      |
|                         | <i>Adamson G.</i> 373                                    | -                 | Malawi       | K                      |
|                         | <i>Wild H.</i> 6147                                      | 08 May 1963       | Malawi       | K                      |
|                         | <i>Finlay R.</i> 10                                      | 02 September 1944 | Zimbabwe     | K                      |
|                         | <i>Whyte</i> 45 (Type)                                   | October 1891      | Malawi       | BM000911007            |
| <i>T. disparile</i>     | <i>Rehmann</i> 5212                                      | -                 | South Africa | K000431776             |
|                         | (Type)                                                   |                   |              |                        |
| <i>T. rufescens</i>     | <i>Schlechter</i> 1851                                   | 22 June 1892      | South Africa | BOL150309, K000431722, |
|                         | (Type)                                                   |                   |              | KFTA0003112            |
| <i>T. transvaalense</i> | <i>Acocks J.P.H. &amp; Hafström A.H.F.</i> 456           | 29 September 1938 | South Africa | PRE0377599-0           |
|                         | <i>Balkwill K.</i> 6509                                  | 05 October 1991   | South Africa | PRE0820593-0           |
|                         | <i>Balkwill K. &amp; Balkwill M.J.</i> 9368              | 14 November 1993  | South Africa | PRE0177785-0           |
|                         | <i>Bester S.P.</i> 14004                                 | 07 December 2017  | South Africa | PRE0870085-0           |
|                         | <i>Bester S.P.</i> 14315                                 | 19 October 2018   | South Africa | PRE0870910-0           |
|                         | <i>Bester S.P.</i> 14320                                 | 19 October 2018   | South Africa | PRE0870915-0           |
|                         | <i>Bester S.P.</i> 7279                                  | 09 October 2006   | South Africa | PRE0841955-0           |
|                         | <i>Bester S.P.</i> 8103                                  | 30 September 2007 | South Africa | PRE0765158-0           |
|                         | <i>Botha D.J. &amp; Ubbink B.</i> 1785                   | 04 November 1976  | South Africa | PRE0950052-0           |
|                         | <i>Bradfield R.D.</i> 268A                               | 03 November 1934  | South Africa | PRE0377589-0           |
|                         | <i>Bredenkamp G.J.</i> 306                               | 20 November 1971  | South Africa | PRE0377640-0           |
|                         | <i>Burgoyne P.M.</i> 10917                               | 23 November 2007  | South Africa | PRE0860237-0           |
|                         | <i>Burt Davy J. s.n.</i> (PRE 2306)                      | 27 October 2004   | South Africa | PRE0377634-0           |
|                         | <i>Burt Davy J. s.n.</i> (PRE 7101)                      | 03 November 2007  | South Africa | PRE0377578-0           |
|                         | <i>Burt Davy J. s.n.</i> (PRE 721)                       | 09 November 2003  | South Africa | PRE0377635-0           |
|                         | <i>Clarke B.</i> 429                                     | 12 November 1972  | South Africa | PRE0377616-0           |
|                         | <i>Clarke B.</i> 430                                     | 12 November 1972  | South Africa | PRE0377617-0           |

|                                            |                   |              |                                           |
|--------------------------------------------|-------------------|--------------|-------------------------------------------|
| Codd L.E.W. 3380                           | 21 November 1947  | South Africa | PRE0377592-0                              |
| Coetzee B.J. 318                           | 09 October 1970   | South Africa | PRE0377639-0                              |
| Coetzee B.J. 397                           | 19 November 1970  | South Africa | PRE0377641-0                              |
| Coetzee B.J. 508                           | 23 November 1970  | South Africa | PRE0377627-0                              |
| Curator Pretoria                           | -                 | South Africa | PRE0377633-0                              |
| Botanical Garden s.n.<br>(PRE 6065)        |                   |              |                                           |
| Davies D.A. 15                             | 20 November 1979  | South Africa | PRE0547830-0                              |
| De Castro A. 1080                          | 25 October 2006   | South Africa | PRE0851159-0                              |
| De Winter B. 406                           | 04 October 1948   | South Africa | PRE0377591-0                              |
| Fries F. 5268                              | 16 October 1930   | South Africa | PRE0950092-0                              |
| Gilfillan D.F. 1419                        | November 1896     | South Africa | B 10 0160791, K000431661,<br>PRE0377575-0 |
| (Type)                                     |                   |              |                                           |
| Gilfillan D.F. 24A                         | October 1898      | South Africa | PRE0377577-0                              |
| Gilfillan D.F. 6068                        | October 1898      | South Africa | PRE0377576-0                              |
| Goossens A.P.G. 69                         | 11 September 1930 | South Africa | PRE0377581-0                              |
| Hahn N. 2668                               | 19 October 2010   | South Africa | PRE0893148-0                              |
| Jacobsen N.H.G. 1644                       | 19 December 1970  | South Africa | PRE0377602-0                              |
| Jenkins s.n. (PRE<br>60359)                | 01 November 2010  | South Africa | PRE0749643-0                              |
| Jenkins T.J. s.n. (TRV<br>6923)            | 01 December 2008  | South Africa | PRE0377629-0                              |
| Kroon N.V. 11709                           | 29 October 1995   | South Africa | PRE0564091-0                              |
| Kurzweg S. K1150                           | 05 May 2009       | South Africa | PRE0861182-0                              |
| Le Roux M.M. 182                           | 18 October 2016   | South Africa | PRE0992427-0                              |
| Leeman A.C. 25                             | 18 November 2028  | South Africa | PRE0377636-0                              |
| Leeman A.C. s.n.<br>(PRE 52815)            | 01 September 2028 | South Africa | PRE0377637-0                              |
| Leendertz R. 255                           | 11 November 2004  | South Africa | PRE0377588-0                              |
| Louw W.J. 80                               | 25 October 1938   | South Africa | PRE0377580-0                              |
| McClean A.P.D. s.n.<br>(PRE 52817)         | 01 December 1943  | South Africa | PRE0377590-0                              |
| Mogg A.O.D. 15219                          | 16 September 2028 | South Africa | PRE0377604-0                              |
| Mogg A.O.D. 23104                          | 13 February 1954  | South Africa | PRE0377594-0                              |
| Moss C.E. 2732                             | 09 October 2019   | South Africa | PRE0377618-0                              |
| Muller P.J. 153B                           | 01 December 1967  | South Africa | PRE0984436-0                              |
| Nelson W.C. 249                            | December 1877     | South Africa | PRE0377587-0                              |
| Obermeyer A.A. 78                          | 01 October 2029   | South Africa | PRE0377621-0                              |
| Peppenene I.P. 71.5 B                      | 16 February 2013  | South Africa | PRE0869051-0                              |
| Phillips E.P. 3034                         | 12 October 2019   | South Africa | PRE0377603-0                              |
| Pole-Evans I.B. s.n.<br>(STEU25815)        | October           | South Africa | PRE0745438-0                              |
| Pott-Leendertz R.<br>34321                 | 04 October 2015   | South Africa | PRE0377584-0                              |
| Reddy R.A., Reddy,<br>K.B. & Reddy, P. 392 | 24 September 1997 | South Africa | PRE0173095-0                              |
| Reddy R.A., Reddy,<br>K.B. & Reddy, P. 791 | 11 October 1997   | South Africa | PRE0175028-0                              |
| Reddy R.A., Reddy,<br>K.B. & Reddy, P. 913 | 11 October 1997   | South Africa | PRE0175079-0                              |
| Reddy R.A., Reddy,<br>K.B. & Reddy, P. 947 | 19 October 1997   | South Africa | PRE0175182-0                              |
| Repton J.E. 3137                           | 12 October 1946   | South Africa | PRE0377632-0                              |
| Repton J.E. 3886                           | 25 November 1951  | South Africa | PRE0377595-0                              |
| Repton J.E. 46                             | 22 October 2028   | South Africa | PRE0377601-0                              |
| Repton J.E. 47                             | 22 October 2028   | South Africa | PRE0377600-0                              |
| Reyneke W.F. s.n.<br>(PRE 52818)           | 24 June 1966      | South Africa | PRE0377643-0                              |
| Rogers F.A. 22065                          | 01 November 2018  | South Africa | PRE0377585-0                              |
| Rogers F.A. 7101                           | 01 November 2007  | South Africa | PRE0377598-0                              |
| SAGP-SAAB/1 66                             | 27 November 1971  | South Africa | PRE0456329-0                              |
| Savage H. D21                              | 31 January 1993   | South Africa | PRE0803148-0                              |
| Schijf H. 158                              | 20 October 1979   | South Africa | PRE0685615-0                              |
| Schlechter F.R.R.<br>3507                  | 19 October 1893   | South Africa | PRE0377622-0                              |

|                                         |                   |              |              |
|-----------------------------------------|-------------------|--------------|--------------|
| <i>Schlechter F.R.R.</i><br>3542        | 22 October 1893   | South Africa | PRE0377630-0 |
| <i>Schlechter F.R.R.</i><br>3549        | 22 October 1893   | South Africa | PRE0377631-0 |
| <i>Schlieben H-J E</i> 8456             | 09 January 1961   | South Africa | PRE0375227-0 |
| <i>Smith C.A.</i> 3341                  | 14 November 2026  | South Africa | PRE0377625-0 |
| <i>Smith C.A.</i> 3372                  | 15 November 2026  | South Africa | PRE0377626-0 |
| <i>Smith C.A.</i> 575                   | 13 September 2025 | South Africa | PRE0377597-0 |
| <i>Stauffer H.U.</i> 5299               | 15 October 1963   | South Africa | PRE0377596-0 |
| <i>Stent S.M. s.n. (PRE</i><br>6065)    | -                 | South Africa | PRE0377583-0 |
| <i>Story R.</i> 1370                    | 02 October 1946   | South Africa | PRE0748257-0 |
| <i>Sutton J.D.</i> 711                  | 13 December 1932  | South Africa | PRE0377638-0 |
| <i>Theiler A.C. s.n.</i><br>(PRE 59974) | 20 November 2012  | South Africa | PRE0745257-0 |
| <i>Theron G.K.</i> 1912                 | 08 November 1968  | South Africa | PRE0382199-0 |
| <i>Unknown</i> 1785                     | 04 November 1976  | South Africa | PRE0517504-0 |
| <i>Van Hoepen E.</i> 1734               | 07 November 1981  | South Africa | PRE0611798-0 |
| <i>Van Rooyen N.</i> 1938               | 27 September 1979 | South Africa | PRE0671299-0 |
| <i>Van Wyk A.E.</i> 1758                | 08 October 1976   | South Africa | PRE0480813-0 |
| <i>Van Wyk S.</i> 245                   | 01 April 1983     | South Africa | PRE0650405-0 |
| <i>Verdoorn I.C.</i> 37                 | 18 November 2019  | South Africa | PRE0377619-0 |
| <i>Visser N.</i> 192A                   | 06 October 2016   | South Africa | PRE0992569-0 |
| <i>Visser N.</i> 193                    | 06 October 2016   | South Africa | PRE0992564-0 |
| <i>Visser N.</i> 194                    | 06 October 2016   | South Africa | PRE0992563-0 |
| <i>Visser N.</i> 199                    | 09 October 2016   | South Africa | PRE0992561-0 |
| <i>Westfall R.H.</i> 21                 | 17 March 1978     | South Africa | PRE0529093-0 |
| <i>Young R.G.N. s.n.</i><br>(TRV 32410) | 22 October 1933   | South Africa | PRE0377620-0 |

---
